# Supplementary material
Source: PubMed Central journal article supplement (PMC4356835)

## Supplemental Data

**Table S1. Primers used for direct sequencing of cytochrome 2C19**

| Polymorphism | Orientation | Primer sequence 5' to 3' |
|--------------|-------------|--------------------------|
| CYP2C19*2    | F           | CAATAAAAATTTCCCCATCAAGA  |
|              | R           | CCTTGACCTGTAAACATCCGTA   |
| CYP2C19*3    | F           | ATTTAGCTTCACCCTGTGATCC   |
|              | R           | AACAGGGCTTTGGAGTTTAGTG   |
| CYP2C19*17   | F           | GCCCTTAGCACCAAATTCTC     |
|              | R           | ATTTAACCCCTAAAAAACACG    |

CYP, cytochrome; F, forward; R, reverse

**Table S2. Classification and repartition of patients according to cytochrome 2C19 genotype<sup>1</sup>**

| CYP2C19 genotype             | CYP2C19 phenotype        | Observed frequency, % (n) |
|------------------------------|--------------------------|---------------------------|
| *2/*2, *3/*3, *2/*3          | Poor metabolizer         | 0 (0)                     |
| *2/*1, *3/*1, *2/*17, *3/*17 | Intermediate metabolizer | 28 (8)                    |
| *1/*1                        | Extensive metabolizer    | 34 (10)                   |
| *17/*17, *17/*1              | Ultra-rapid metabolizer  | 38 (11)                   |

1. Mega JL, Close SL, Wiviott SD et al. Cytochrome p-450 polymorphisms and response to clopidogrel. N Engl J Med 2009; **360**: 354-62.

**Table S3. Repartition of patients according to cytochrome 3A genotype**

|                                   | Observed frequency, % (n) |
|-----------------------------------|---------------------------|
| CYP3A4 genotype                   |                           |
| *1/*1 (extensive metabolizer)     | 76 (22)                   |
| *22/*1 (intermediate metabolizer) | 24 (7)                    |
| CYP3A5 genotype                   |                           |
| *3/*3 (nonexpresser)              | 97 (28)                   |
| *1/*3 (expresser)                 | 3 (1)                     |

**Figure S1. Combined influence of CYP2C19 and CYP3A4 genotypes on initial VRC concentration adjusted to dose during oral treatment**

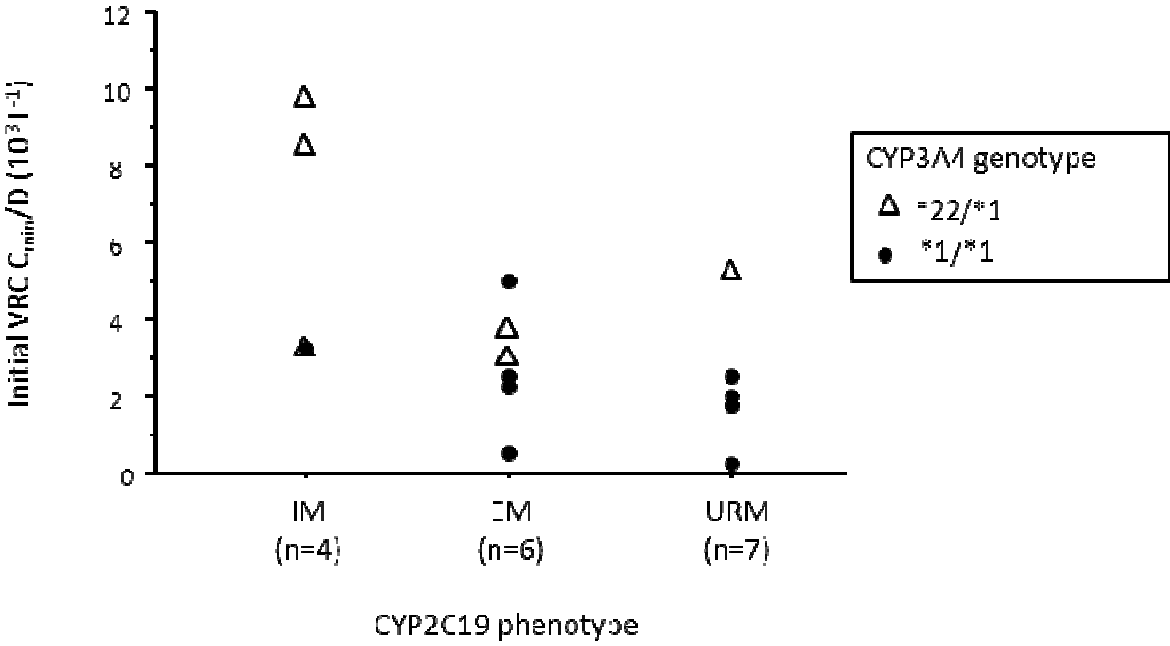

**Figure S2. Pairwise patient analysis of voriconazole trough concentrations with and without glucocorticoid**

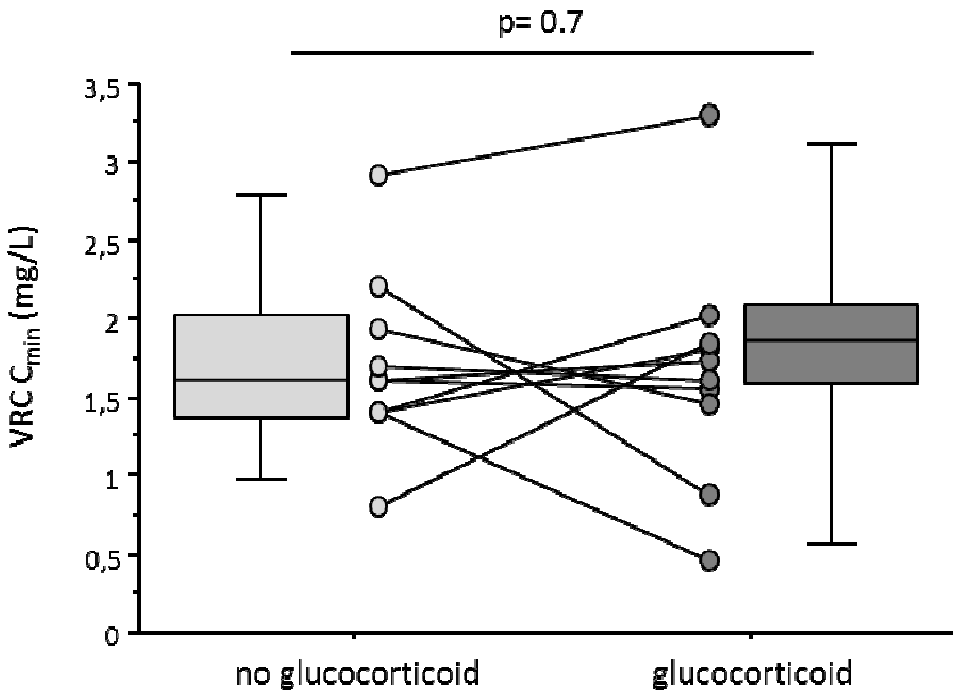

Supplement: AAC.04838-14_zac004153858so1.pdf [file AAC.04838-14_zac004153858so1.pdf]
